# Supplementary material
Source: Springer Nature journal article supplement (https://www.springermedizin.de/resource/supplementary/12936_2005_191_MOESM1_ESM.pdf/9547140)
Supplement: MOESM1 [file 9547140]

**A. Ikonos image**

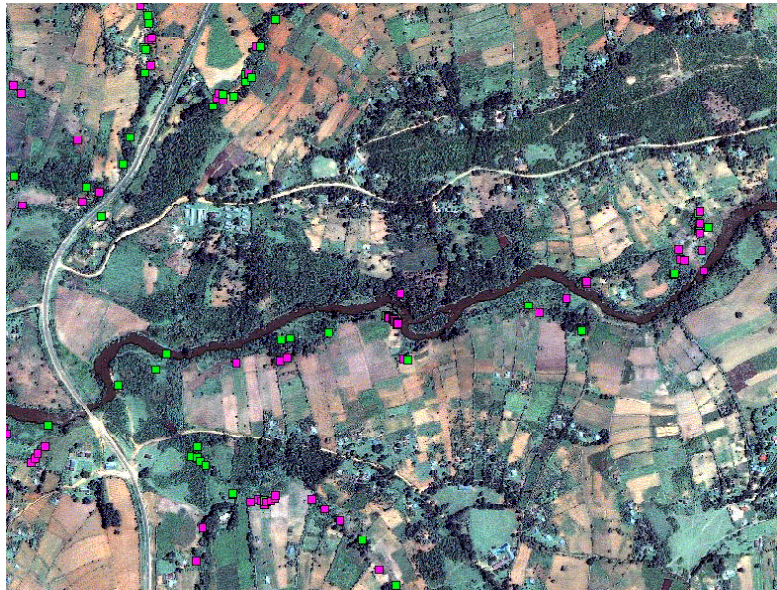

500 m

 Aquatic habitat without *A. gambiae* larvae

**B. Aerial photo**

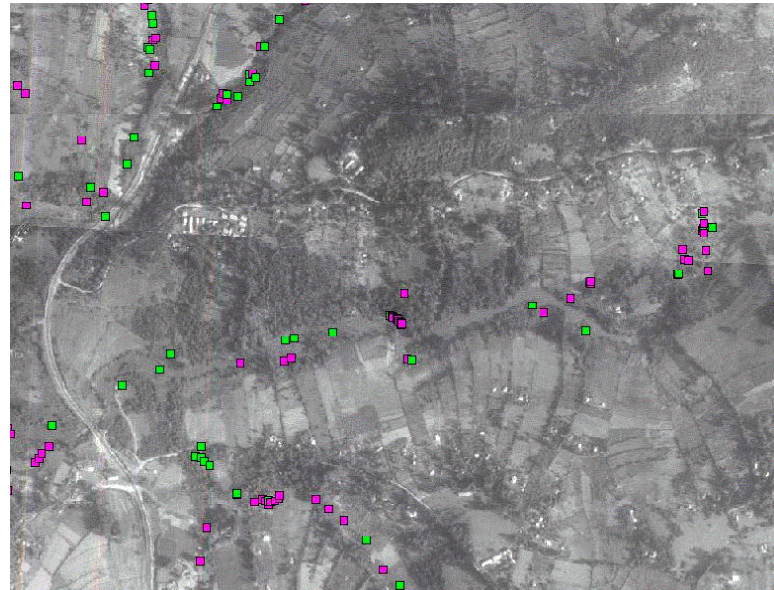

500 m

 Aquatic habitat with *A. gambiae* larvae
